# Supplementary material for: Vesicular Integral-Membrane Protein 36 Is Involved in the Selective Secretion of Fucosylated Proteins into Bile Duct-like Structures in HepG2 Cells
Source: MDPI journal article supplement (doi:10.3390/ijms24087037), 2023-04-11
Supplement: s1 [file s1]

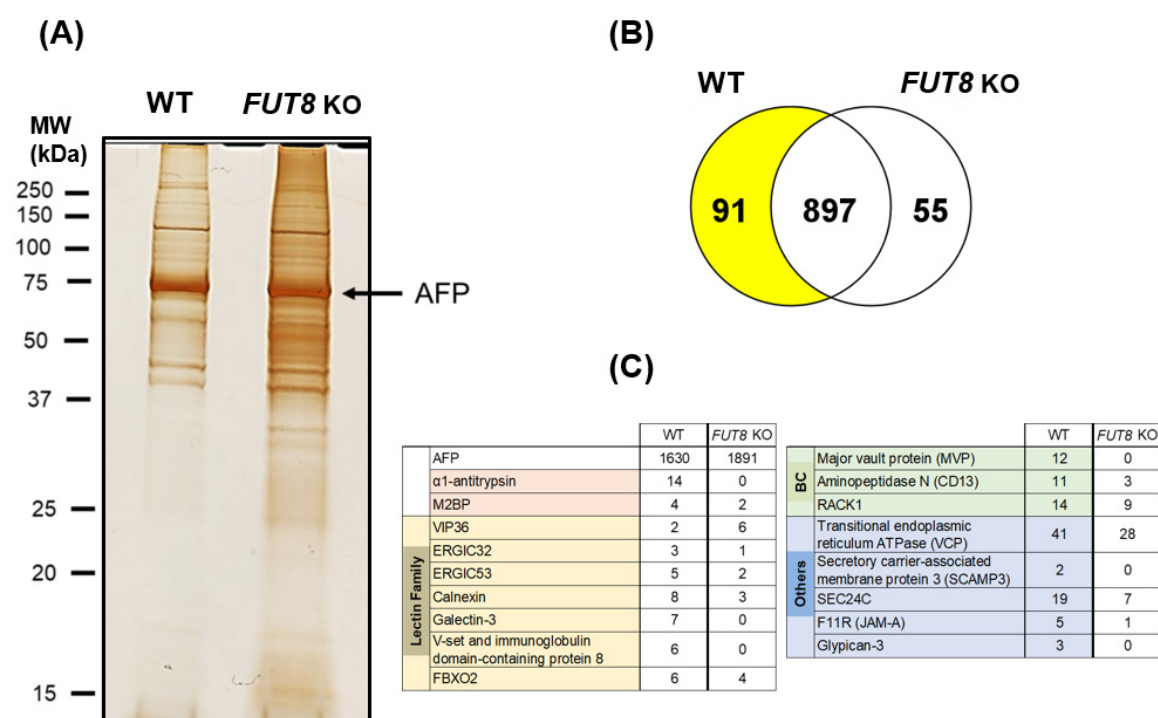

**Supplemental Figure S1.** Identification of intracellular binding molecules involved in AFP transport. We aimed to identify the cargo receptor of AFP using the Strep-tag/Strep-Tactin system. HepG2 cell lysates that expressed AFP-Strep-tag were reacted with Strep-Tactin beads, and the sediment was electrophoresed using a 10% SDS-acrylamide gel. (A) Silver-stained gel. (B) Results of mass spectrometry as a Venn diagram. (C) Classification of the proteins identified by mass spectrometry. The numbers represent the number of hits for each protein. BC: bile canaliculus (bile duct-like structure).
